# Supplementary material
Source: PubMed Central journal article supplement (PMC7498151)
Supplement: la0c01992_si_001.pdf [file la0c01992_si_001.pdf]

# Supporting Information

## Arrangement of Ceramides in the Skin: Sphingosine Chains Localize at a Single Position in Stratum Corneum Lipid Matrix Models

Charlotte M. Beddoes<sup>1</sup>, Gert S. Gooris<sup>1</sup>, Fabrizia Foglia<sup>2</sup>, Delaram Ahmadi<sup>3</sup>, David J. Barlow<sup>3</sup>, M. Jayne  
Lawrence<sup>4</sup>, Bruno Demé<sup>5</sup>, Joke A. Bouwstra<sup>1\*</sup>.

<sup>1</sup>Division of BioTherapeutics, Leiden Academic Centre for Drug Research, University of Leiden, Leiden, The Netherlands. <sup>2</sup>Chemistry Department, Christopher Ingold Laboratories, University College London, London, WC1H 0AJ, United Kingdom. <sup>3</sup>Pharmaceutical Science Division, King's College London, London, United Kingdom. <sup>4</sup>Division of Pharmacy and Optometry, Manchester University, Manchester, United Kingdom. <sup>5</sup>Institute Laue-Langevin, Grenoble, France.

### Correspondence address:

Prof. dr. Joke A. Bouwstra

Email: [bouwstra@chem.leidenuniv.nl](mailto:bouwstra@chem.leidenuniv.nl)

### This file contains:

Number of Pages: 5

Number of Tables: 1

Table S1: Model composition

Number of Methods: 1

Method S1: Calculating the SLD absolute scale

Number of Figures: 4

Figure S1: Example of the SAND rocking plot

Figure S2: Relative structure factor of the various diffraction orders

Figure S3: Molecular arrangement of CER NS when in a linear extended conformation

Figure S4: The effect of the Fourier truncation error

## Tables

**Table S1:**

Neutron sample list including composition and lipid ratio. Deuterated components and molar ratios are highlighted in bold.

| <b>Model</b>          | <b>Composition</b>                                                         | <b>Ratio</b>                                  |
|-----------------------|----------------------------------------------------------------------------|-----------------------------------------------|
| Simple                | CER EOS/CER NS/ CHOL/FFA5                                                  | 0.4/0.6/1/1                                   |
| CER NS-d7<br>Simple   | CER EOS/ <b>CER NS-d7</b> / CHOL/FFA5                                      | 0.4/ <b>0.6</b> /1/1                          |
| CER NS-d47<br>Simple  | CER EOS/ <b>CER NS-d47</b> / CHOL/FFA5                                     | 0.4/ <b>0.6</b> /1/1                          |
| Porcine               | CER EOS/CER NS/CER NP/CER AS/CER<br>NP(C16)/CER AP/ CHOL/FFA7              | 0.4/0.36/0.11/0.03/0.06/0.0<br>4/1/1          |
| CER NS-d7<br>Porcine  | CER EOS/ <b>CER NS-d7</b> /CER NP/CER AS/CER<br>NP(C16)/CER AP/ CHOL/FFA7  | 0.4/ <b>0.36</b> /0.11/0.03/0.06/0.0<br>4/1/1 |
| CER NS-d47<br>Porcine | CER EOS/ <b>CER NS-d47</b> /CER NP/CER AS/CER<br>NP(C16)/CER AP/ CHOL/FFA7 | 0.4/ <b>0.36</b> /0.11/0.03/0.06/0.0<br>4/1/1 |

## Methods

### Method S1:

Using the formula for each of the models,  $F_0$  was calculated using the NIST neutron activation and scattering calculator<sup>1</sup>. Calculated values of  $F_0$  in 100% D<sub>2</sub>O were as follows;

| <b>Model</b>       | <b><math>F_0 \times 10^{-6} (\text{Å}^{-2})</math></b> |
|--------------------|--------------------------------------------------------|
| Simple             | 0.39                                                   |
| CER NS-d7 Simple   | 0.506                                                  |
| CER NS-d47 Simple  | 1.26                                                   |
| Porcine            | 0.39                                                   |
| CER NS-d7 Porcine  | 0.476                                                  |
| CER NS-d47 Porcine | 0.93                                                   |

The relative absolute scaling values were determined as previously described by Wiener et al.<sup>2</sup> and Mojumdar et al.<sup>3</sup>. Initially the SLD peak height ( $SLD_{\text{initial}}$ ) and area ( $SLD_{\text{area}}$ ), with a known number of deuterium atoms per lipid is fitted (in the case of CER NS-d7 samples each deuterated peak represents 7 deuterium per lipid). The difference in the  $SLD_{\text{area}}$  between the deuterated and protiated model was determined. This area was attributed to the number of deuterium atoms present in the model. Calculating the difference in the SLD value

due to this isotope exchange ( $SLD_{dif}$ ), the relative absolute SLD value ( $SLD_{corrected}$ ) for that peak can be determined;

$$SLD_{corrected} = \frac{SLD_{initial} * SLD_{dif}}{SLD_{area}}$$

And from the ratio between  $SLD_{initial}$  and  $SLD_{corrected}$  the scaling factor between the deuterated and protiated samples can be determined and applied to the  $F_n$  values.

1. NIST Center of Neutron Research, <https://www.ncnr.nist.gov/resources/activation/> (Accessed: May 2020)
2. Wiener, M. C., et al. (1991). "Structure of a fluid dioleoylphosphatidylcholine bilayer determined by joint refinement of x-ray and neutron diffraction data. I. Scaling of neutron data and the distributions of double bonds and water." *Biophysical Journal* **60**(3): 568-576.
3. Mojumdar, E. H., et al. (2013). "Localization of Cholesterol and Fatty Acid in a Model Lipid Membrane: A Neutron Diffraction Approach." *Biophysical Journal* **105**(4): 911-918.

## Figures

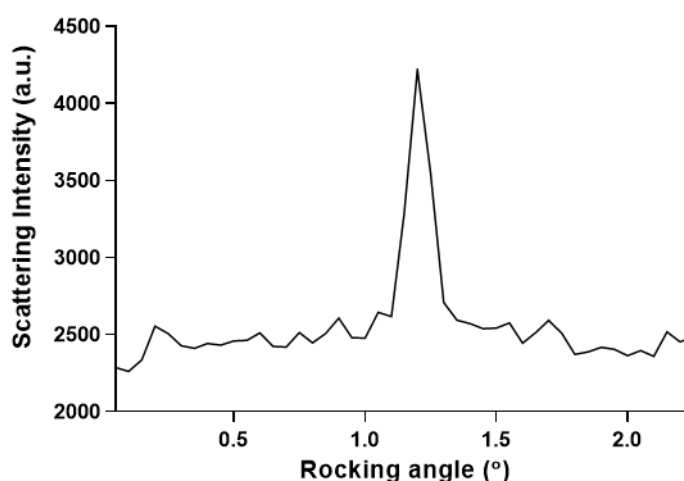

**Figure S1:**

Example of the sample rocking plot intensity over a specified at a limited  $2\theta$  range. In this plot the  $2\theta$  range was set between 1.8 -2.0 to determine the specular scan number ( $\pm 0.1^\circ$ ) of the 1<sup>st</sup> order ( $q=0.044 \text{ nm}^{-1}$ ) of the porcine model hydrated in 100%  $D_2O$ .

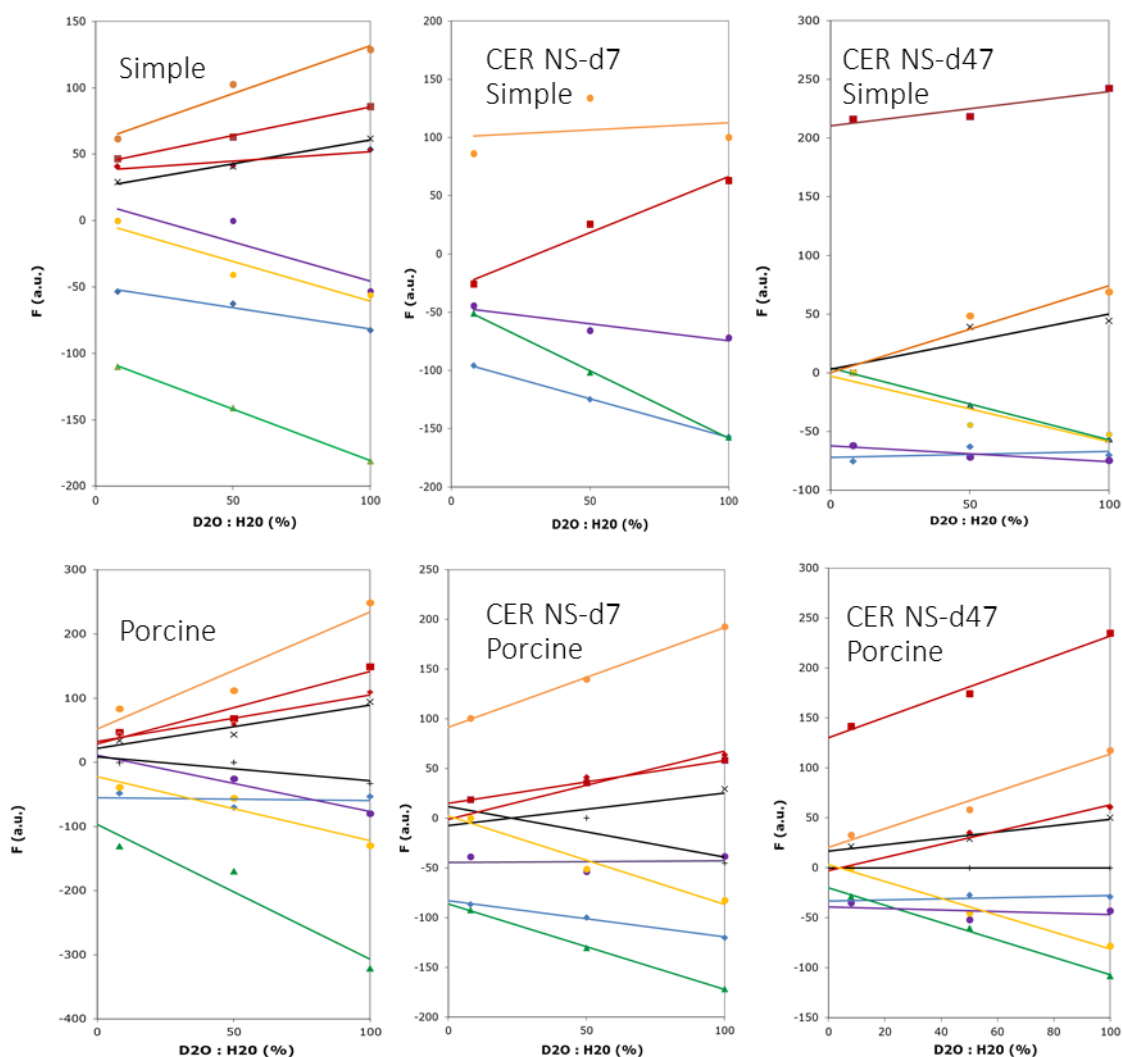

**Figure S2:**

Relative structure factor of the various diffraction orders, as a function of  $D_2O/H_2O$  volume ratio. The Bragg orders for each sample are represented at 1<sup>st</sup> (blue,  $\blacklozenge$ ), 2<sup>nd</sup> (red,  $\blacksquare$ ), 3<sup>rd</sup> (green,  $\blacktriangle$ ), 4<sup>th</sup> (black, X), 5<sup>th</sup> (purple,  $\bullet$ ), 6<sup>th</sup> (Orange,  $\bullet$ ), 7<sup>th</sup> (black, +), 8<sup>th</sup> (red,  $\blacklozenge$ ), and 9<sup>th</sup> (yellow,  $\bullet$ ). The linear difference in the structure factor against the solvent ratios indicates that the samples were sufficiently hydrated for contrast variation measurements.

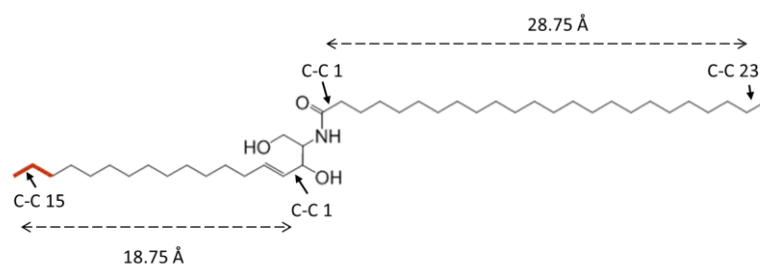

**Figure S3:**

Molecular arrangement of CER NS when in a linear extended conformation. In this arrangement a C18 sphingosine chain extends along 15 C-C bonds, equating to a length of 1.875 nm. The acyl chain has a length of 23 C-C bonds, at a length of 2.875 nm. The deuterated component of the sphingosine chain is highlighted in red, lengths were calculated assuming a C-C bond length of 1.25Å.

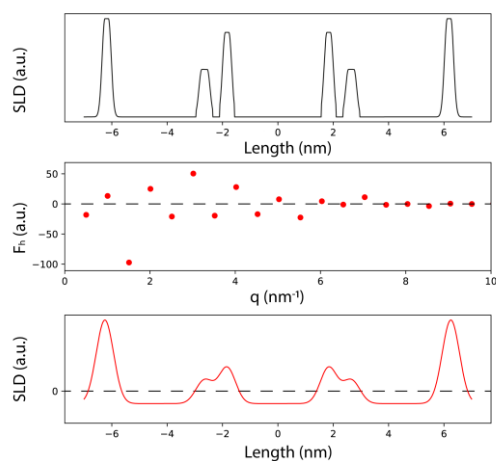

**Figure S4:**

The baseline of the SLD profiles in Figure 4 contains some small unexpected peaks. In the case of the 8:92 D<sub>2</sub>O:H<sub>2</sub>O profile, three extra peaks located at  $\sim -4.5$ , 0, 4.5 nm are observed in both the experimentally derived, and theoretically calculated SLD profiles, which were not accounted for in the unit cell model. These extra peaks are due to the limited number of  $F_n$  values used in order to mimic the conditions from the experimental measurements. Figure SI5 shows the same SLD profile as presented in Figure 4, but theoretically calculated with  $F_n = 20$ , thus significantly reducing the data truncation error. The top plot illustrates the same LPP model used in Figure 4, the central figure shows the first 20  $F_n$  values, of the 20 values calculated. As the  $F_n$  number increases, its values, and thus its overall contribution decreases. However by utilizing the values for the first 20  $F_n$  values, the base line of the SLD profile (bottom plot) becomes much clearer, and the extra peaks are no longer present, thus implying that these are not true peaks but rather artifacts from the limited structure factor values.
